# Supplementary material for: Regulatory Network of the Scoliosis-Associated Genes Establishes Rostrocaudal Patterning of Somites in Zebrafish
Source: PubMed Central journal article supplement (PMC6360518; doi:10.1016/j.isci.2019.01.021), 2019-01-21
Supplement: mmc1.pdf [file mmc1.pdf]

**ISCI, Volume 12**

**Supplemental Information**

**Regulatory Network of the Scoliosis-Associated  
Genes Establishes Rostrocaudal Patterning  
of Somites in Zebrafish**

**Sevdenur Keskin, M. Fethullah Simsek, Ha T. Vu, Carlton Yang, Stephen H. Devoto, Ahmet Ay, and Ertuğrul M. Özbudak**

## SUPPLEMENTARY FILES

### SUPPLEMENTARY FIGURE AND LEGEND

Figure S1

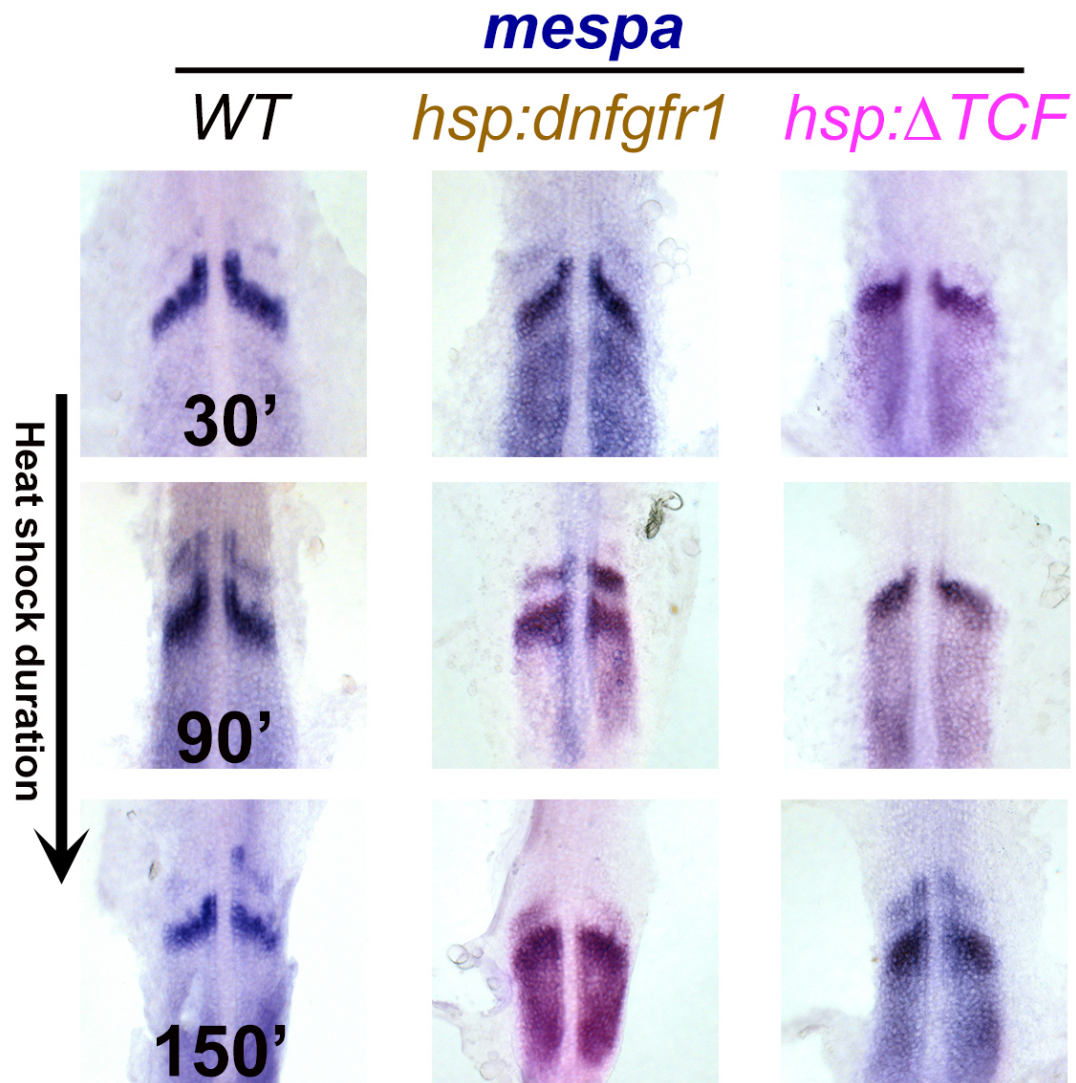

**Figure S1. Expression of *mespa* genes reads out the FGF signaling, Related to Figure 2.** Flat mounted ISH images of *mespa* transcripts at different time points of heat shock of *tg(hsp70l:dnfgfr1a-EGFP)*, *tg(hsp70l:tcf711a-GFP)* and wild-type (WT) embryos) at 37 °C. 8 to 22 embryos were flat-mounted for each time points.

**SUPPLEMENTARY TABLES**

**Table S1. Description of Simulation Parameters, Related to Figure 5**

| <b>Parameter</b>                    | <b>Description of parameter</b>     | <b>Range</b>      | <b>Set</b> |
|-------------------------------------|-------------------------------------|-------------------|------------|
| <i>msh</i>                          | her mRNA synthesis rate             | [67.2,69.3]       | 67.4       |
| <i>msm<sub>a</sub></i>              | mespa mRNA synthesis rate           | [30.1,40.3]       | 40.2       |
| <i>msm<sub>b</sub></i>              | mespb mRNA synthesis rate           | [46.6,50.9]       | 50.1       |
| <i>msd</i>                          | delta mRNA synthesis                | [31.6,33.7]       | 32.6       |
| <i>mdh</i>                          | her mRNA degradation                | 0.5               | 0.5        |
| <i>mdm<sub>a</sub></i>              | mespa mRNA degradation rate         | 0.1               | 0.1        |
| <i>mdm<sub>b</sub></i>              | mespb mRNA degradation rate         | [0.1,0.11]        | 0.101      |
| <i>mdd</i>                          | delta mRNA degradation rate         | 0.5               | 0.5        |
| <i>psh</i>                          | her protein synthesis rate          | [10.4,10.7]       | 10.6       |
| <i>psm<sub>a</sub></i>              | mespa protein synthesis rate        | [34.4,53.4]       | 43         |
| <i>psm<sub>b</sub></i>              | mespb protein synthesis rate        | [19.1,21.5]       | 21.5       |
| <i>psd</i>                          | delta protein synthesis rate        | [26.4,26.6]       | 26.5       |
| <i>pdh</i>                          | her protein degradation rate        | [0.183,0.185]     | 0.183      |
| <i>pdm<sub>a</sub></i>              | mespa protein degradation rate      | [0.155,0.273]     | 0.157      |
| <i>pdm<sub>b</sub></i>              | mespb protein degradation rate      | [0.1,0.227]       | 0.109      |
| <i>pdd</i>                          | delta protein degradation rate      | 0.5               | 0.5        |
| <i>dahh</i>                         | her-her dimer association rate      | 0.0003            | 0.0003     |
| <i>dam<sub>a</sub>m<sub>a</sub></i> | mespa-mespa dimer association rate  | [0.00293,0.00387] | 0.00297    |
| <i>dam<sub>a</sub>m<sub>b</sub></i> | mespa-mespb dimer association rate  | [0.0256,0.03]     | 0.029      |
| <i>dam<sub>b</sub>m<sub>b</sub></i> | mespb-mespb dimer association rate  | [0.00337,0.00617] | 0.00381    |
| <i>ddhh</i>                         | her-her dimer dissociation rate     | [0.194,0.209]     | 0.202      |
| <i>ddm<sub>a</sub>m<sub>a</sub></i> | mespa-mespa dimer dissociation rate | [0.00303,0.0252]  | 0.00497    |
| <i>ddm<sub>a</sub>m<sub>b</sub></i> | mespa-mespb dimer dissociation rate | [0.214,0.276]     | 0.27       |
| <i>ddm<sub>b</sub>m<sub>b</sub></i> | mespb-mespb dimer dissociation rate | [0.0952,0.3]      | 0.293      |
| <i>pdhh</i>                         | her-her dimer degradation rate      | [0.17,0.172]      | 0.171      |
| <i>pdm<sub>a</sub>m<sub>a</sub></i> | mespa-mespa dimer degradation rate  | [0.179,0.222]     | 0.202      |
| <i>pdm<sub>a</sub>m<sub>b</sub></i> | mespa-mespb dimer degradation rate  | [0.1,0.109]       | 0.1        |
| <i>pdm<sub>b</sub>m<sub>b</sub></i> | mespb-mespb dimer degradation rate  | [0.438,0.489]     | 0.439      |
| <i>delaymh</i>                      | her mRNA synthesis delay rate       | [7,7.01]          | 7.01       |
| <i>delaymm<sub>a</sub></i>          | mespa mRNA synthesis delay rate     | 15                | 15         |
| <i>delaymm<sub>b</sub></i>          | mespb mRNA synthesis delay rate     | [14.6,15]         | 14.8       |
| <i>delaymd</i>                      | delta mRNA synthesis delay rate     | [8.99,9.05]       | 9          |
| <i>delayph</i>                      | her protein synthesis delay rate    | 1.14              | 1.14       |
| <i>delaypm<sub>a</sub></i>          | mespa protein synthesis delay rate  | [0.4,0.524]       | 0.407      |
| <i>delaypm<sub>b</sub></i>          | mespb protein synthesis delay rate  | [0.4,0.47]        | 0.405      |
| <i>delaypd</i>                      | delta protein synthesis delay rate  | 12.6              | 12.6       |

|                                       |                                              |             |      |
|---------------------------------------|----------------------------------------------|-------------|------|
| <i>delta<sub>M</sub></i>              | delay for indirect mesp-ripply-tbx6 feedback | [42.7,43.1] | 42.7 |
| <i>critphh</i>                        | critical binding rate of her-her dimer       | [390,406]   | 394  |
| <i>critpd</i>                         | critical binding rate of delta protein       | [603,651]   | 651  |
| <i>critp<sub>a</sub>m<sub>a</sub></i> | critical binding rate of mespa-mespa dimer   | [1679,1986] | 1984 |
| <i>critp<sub>b</sub>m<sub>b</sub></i> | critical binding rate of mespb-mespb dimer   | [500,659]   | 501  |
| <i>oeher</i>                          | her over expression rate                     | [27.8,31]   | 29.7 |
| <i>oemespa</i>                        | mespa over expression rate                   | [30.9,96.3] | 53.5 |
| <i>oemespb</i>                        | mespb over expression rate                   | [51.9,84.3] | 66.7 |

**Table S2. Description of Simulation Conditions, Related to Figure 5**

| <b>Genetic Background</b>                                                                                   | <b>Tested Condition</b>                                                                             | <b>Check Time</b> |
|-------------------------------------------------------------------------------------------------------------|-----------------------------------------------------------------------------------------------------|-------------------|
| <b><i>Wildtype:</i></b>                                                                                     |                                                                                                     |                   |
|                                                                                                             | <i>Her</i> mRNA oscillation period is ~30 minutes.                                                  | 100 – 300         |
|                                                                                                             | <i>Her</i> mRNA expression shows sustained oscillation.                                             | 100 – 300         |
|                                                                                                             | <i>Her</i> mRNA period increases from posterior end of the PSM to the anterior end of the PSM.      | 600 – 900         |
|                                                                                                             | <i>Her</i> mRNA oscillations are synchronized between neighboring cells.                            | 600 – 630         |
|                                                                                                             | <i>Her</i> and <i>mespa</i> mRNAs show complementary pattern in the anterior PSM.                   | 600 – 630         |
| <b><i>Notch1a<sup>-/-</sup> mutant: DeltaC protein synthesis is set to 0.</i></b>                           |                                                                                                     |                   |
|                                                                                                             | <i>Her</i> mRNA period increases 7%-20% in <i>notch1a<sup>-/-</sup></i> mutant.                     | 100 – 300         |
|                                                                                                             | <i>Her</i> mRNA amplitude decreases 15%-70% in <i>notch1a<sup>-/-</sup></i> mutant.                 | 600 – 630         |
|                                                                                                             | <i>Her</i> mRNA oscillations are desynchronized in <i>notch1a<sup>-/-</sup></i> mutant.             | 600 – 630         |
|                                                                                                             | <i>Mespa</i> mRNA amplitude decreases more than 70% in <i>notch1a<sup>-/-</sup></i> mutant.         | 600 – 630         |
|                                                                                                             | <i>Mespb</i> mRNA oscillations are desynchronized in <i>notch1a<sup>-/-</sup></i> mutant.           | 600 – 630         |
| <b><i>Her overexpression: Her protein synthesis is increased for 30 min starting after 600 min.</i></b>     |                                                                                                     |                   |
|                                                                                                             | <i>Her</i> mRNA amplitude decreases more than 70% in 30 minutes after <i>her</i> overexpression.    | 630 – 660         |
|                                                                                                             | <i>DeltaC</i> mRNA amplitude decreases more than 70% in 30 minutes after <i>her</i> overexpression. | 630 – 660         |
|                                                                                                             | <i>Mespa</i> mRNA amplitude decreases more than 70% in 30 minutes after <i>her</i> overexpression.  | 630 – 660         |
|                                                                                                             | <i>Mespb</i> mRNA oscillations are desynchronized in 1.5 hours after <i>her</i> overexpression.     | 690 – 720         |
| <b><i>Notch signaling disruption by DAPT: DeltaC protein synthesis is set to 0 after 600 min.</i></b>       |                                                                                                     |                   |
|                                                                                                             | <i>Her</i> mRNA oscillations are desynchronized in 4 hours after DAPT treatment.                    | 840 – 870         |
|                                                                                                             | <i>Her</i> mRNA amplitude decreases 15%-70% in 4 hours after DAPT treatment.                        | 840 – 870         |
|                                                                                                             | <i>Mespa</i> mRNA amplitude decreases more than 70% in 2 hours after DAPT treatment.                | 720 – 750         |
|                                                                                                             | <i>Mespb</i> mRNA oscillations are desynchronized in 4 hours after DAPT treatment.                  | 840 – 870         |
| <b><i>Mespa overexpression: Mespa protein synthesis is increased for 60 min starting after 600 min.</i></b> |                                                                                                     |                   |
|                                                                                                             | <i>Mespb</i> mRNA amplitude decreases more than 70% in 1 hour after <i>mespa</i> overexpression.    | 660 – 690         |
| <b><i>Mespb overexpression: Mespb protein synthesis is increased for 60 min starting after 600 min.</i></b> |                                                                                                     |                   |
|                                                                                                             | <i>Mespb</i> mRNA amplitude decreases more than 70% in 1 hour after <i>mespb</i> overexpression.    | 660 – 690         |

## TRANSPARENT METHODS

### CONTACT FOR REAGENT AND RESOURCE SHARING

Further information and requests for reagents may be directed to the Lead Contact Ertugrul Ozbudak ([Ertugrul.Ozbudak@cchmc.org](mailto:Ertugrul.Ozbudak@cchmc.org)).

### EXPERIMENTAL MODEL AND SUBJECT DETAILS

#### Fish stocks

All the fish experiments were performed under the ethical guidelines of Albert Einstein College of Medicine and Cincinnati Children's Hospital Medical Center, and animal protocols were reviewed and approved by the respective Institutional Animal Care and Use Committees (Protocol # 20150704 and Protocol # 2017-0048). Fish were kept on a 14-10 light/dark cycle at the Zebrafish Core Facility, maintained at 28.5°C. Transgenic lines *hsp70:HA-her7* (Giudicelli et al., 2007), *hsp70l:mespab-myc*, *hsp70l:mespbb-myc*, *hsp70l:rippy1-myc* (Windner et al., 2015) *hsp70l:dnfgfr1a-EGFP* (Lee et al., 2005) and *hsp70l:tcf7l1a-GFP* (Lewis et al., 2004) were used during this study.

### METHOD DETAILS

#### Heat-shock procedures

We used heat-shock inducible promoters to perform time-controlled perturbation experiments throughout this study. This approach induces transgenes very rapidly (Giudicelli et al., 2007) as compared to alternative Tet-on inducible system (Watanabe et al., 2007; Wehner et al., 2015). Transgenic heterozygous fishes were crossed to wild-type fish to obtain transgenic and control embryos with equal proportions. Embryos were kept at a temperature range of 23-28°C until the desired stage for heat-shock. They were then transferred to pre-warmed E3 medium in a 37°C incubator for the desired length of time, then fixed immediately in ice-cold 4% paraformaldehyde or returned to 28°C for further development and fixation at a late recovery time point (Giudicelli et al., 2007). Temporal loss of function of Notch signaling was accomplished by exposing embryos to 100 µM of the  $\gamma$ -secretase inhibitor, *N*-[*N*-(3,5-difluorophenacetyl)-*L*-alanyl]-*S*-phenylglycine *t*-butyl ester (DAPT) in DMSO (Ozbudak and Lewis, 2008). Control embryos were exposed to DMSO.

#### In situ hybridization

In situ hybridization was performed according to standard protocols. Digoxigenin-labelled RNA probes were as previously described for *her1* (Takke and Campos-Ortega, 1999), *her7* (Henry et al., 2002; Oates and Ho, 2002), *deltaC* (Jiang et al., 2000) and *cb1045* (*xirp2a* – Zebrafish Information Network) (Riedel-Kruse et al., 2007). Probes for *mespaa*, *mespba*, and *rippy1* are generated using the nucleotides in between 1-887, 1-801, and 86-785, respectively. We validated the genotype of the selected embryos by PCR by using the following primers: *mespab*Uprv: TCAACATTGGCATTTCAGG, *mespab*F\_NOT1: gatcGCGGCCGC GCATTCACTCAAGCTCCAGA, *mespbb*R\_ECOR1: gatcGAATTCCAGTGGACGCCTTTGTTGTA, *mespbb*F\_NOT1: gatcGCGGCCGCTAGCGGTGGTCTGGACAGG, *shHsp70l*\_BbvCIfw: gatcCCTCAGCCACACAACCGCACATTTTC and *rippy1*rv: CCTCGACGTCACCTTCATCA.

### QUANTIFICATION AND STATISTICAL ANALYSIS

#### Mathematical model

We developed a delayed differential equation model (DDE) with 12 equations (see below) and 44 parameters (Table S1). Each equation in our DDE model represents the rate of change of a model state (mRNA, protein, or protein complex); each model parameter represents the rate of the corresponding reaction that influences the concentrations of the model states. Biological reaction terms describe the synthesis and degradation of mRNAs and proteins, as well as dimer association, dissociation, and degradation.

The genes included in the model are *her*, *deltaC*, *mespa* and *mespb*. Following Lewis (2003) (Lewis, 2003), we represented *her1* and *her7* genes as one *her* gene. In our model, Her protein forms Her-Her homodimer, and represses transcription of *her*, *deltaC*, and *mespa* genes (Figure 5E). Mesp proteins form dimers to repress transcription of *mespb* gene. DeltaC triggers the proteolytic cleavage of the Notch protein intracellular domain (NICD). NICD translocates into the nucleus and activates the transcription of *her*, *mespa*, and *mespb*. The transcriptional repressors Her-Her, Mespa-Mespa, and Mesp-Mesp compete with the NICD protein for binding to the DNA regulatory region to repress transcription of *her*, *mespa* and *mespb* genes (Ozbudak and Lewis, 2008). To simplify the model, we followed earlier work (Ay et al., 2014; Lewis, 2003) and did not explicitly write an equation representing the production of NICD. Instead, we represented NICD levels in each cell as a function of the DeltaC protein levels in all neighboring cells.

The variables:  $mh$ ,  $md$ ,  $mm_a$  and  $mm_b$  represent the number of mRNA molecules of *her*, *deltaC*, *mespa* and *mespb* respectively;  $ph$ ,  $pd$ ,  $pm_a$  and  $pm_b$  represent the number of protein molecules of Her, DeltaC, Mespa and Mesp respectively; and  $phh$ ,  $pm_a m_a$ ,  $pm_b m_b$  and  $pm_a m_b$  represent the number of molecules of Her-Her, Mespa-Mespa, Mesp-Mesp and Mespa-Mesp dimers, respectively. mRNA synthesis rates are denoted as  $msh$ ,  $msd$ ,  $msm_a$  and  $msm_b$  for *her*, *deltaC*, *mespa* and *mespb* genes, respectively. mRNA degradation rates are denoted as  $mdh$ ,  $mdd$ ,  $mdm_a$  and  $mdm_b$  for *her*, *deltaC*, *mespa* and *mespb* mRNAs, respectively. Protein synthesis rates are denoted as  $psh$ ,  $psd$ ,  $psm_a$  and  $psm_b$  for Her, DeltaC, Mespa and Mesp proteins, respectively. Degradation rates for Her, DeltaC, Mespa and Mesp proteins are denoted as  $pdh$ ,  $pdd$ ,  $pdm_a$  and  $pdm_b$ , respectively. Dimer association, dissociation, and degradation rates for Her-Her are represented by  $dahh$ ,  $dhhh$  and  $pdhh$ , respectively. Dimer association, dissociation, and degradation rates for Mespa-Mespa, Mesp-Mesp and Mespa-Mesp are represented by  $dama_a$ ,  $dma_a m_a$ ,  $pda_a m_a$ ,  $damb_b$ ,  $dmb_b m_b$ ,  $pdb_b m_b$ ,  $dama_b$ ,  $dma_a m_b$ , and  $pda_a m_b$ , respectively. DNA-binding dissociation rates are  $critphh$ ,  $critpd$ ,  $critpm_a m_a$ , and  $critpm_b m_b$  for Her-Her, Notch (NICD), Mespa-Mespa, and Mesp-Mesp, respectively. Transcriptional time delays of *her*, *deltaC*, *mespa*, and *mespb* mRNAs include the transcription, splicing, and nuclear-to-cytoplasmic transport, and these delays are represented by  $delaymh$ ,  $delaymd$ ,  $delaym_a$ , and  $delaym_b$ , respectively. The translational time delays of Her, Mespa and Mesp proteins include translation and nuclear import of these repressor proteins, and these delays are represented by  $delayph$ ,  $delayp_a$ , and  $delayp_b$ , respectively. The translational time delay of DeltaC protein includes translation and localization of DeltaC protein at the membrane, interaction of Delta-Notch proteins, and production and localization of NICD at the nucleus, and is expressed as  $delaypd$ . Likewise, we defined the time-delay  $\delta_M$ , to represent the total time-delay in the indirect regulatory interactions between Mesp, Ripply1, and Tbx6 proteins (Windner et al., 2015). We represent the  $k$ th cell as  $c_k$  and time as  $t$ .

Delay Differential Equation Model:

A. mRNA Levels

A.1. her mRNA Levels

$$\frac{\partial mh(c_k, t)}{\partial t} = msh \frac{1 + \frac{1}{6} \sum_{c_n \in N} \frac{pd(c_n, t - delay_{mh})}{critpd}}{1 + \frac{1}{6} \sum_{c_n \in N} \frac{pd(c_n, t - delay_{mh})}{critpd} + \left[ \frac{phh(c_k, t - delay_{mh})}{critphh} \right]^2} - mdh \cdot mh(c_k, t)$$

A.2. deltaC mRNA Levels

$$\frac{\partial md(c_k, t)}{\partial t} = msd \frac{1}{1 + \left[ \frac{phh(c_k, t - delay_{md})}{critphh} \right]^2} - mdd \cdot md(c_k, t)$$

A.3. mespa mRNA Levels

$$\frac{\partial mm_a(c_k, t)}{\partial t} = msm_a \frac{\frac{1}{6} \sum_{c_n \in N} \frac{pd(c_n, t - delay_{mm_a})}{critpd}}{1 + \frac{1}{6} \sum_{c_n \in N} \frac{pd(c_n, t - delay_{mm_a})}{critpd} + \left[ \frac{phh(c_k, t - delay_{mm_a})}{critphh} \right]^2} - mdm_a \cdot m_a(c_k, t)$$

A.4. mespb mRNA Levels

$$\frac{\partial mm_b(c_k, t)}{\partial t} = msm_b \left[ \frac{1 + \frac{1}{6} \sum_{c_n \in N} \frac{pd(c_n, t - delay_{mm_b})}{critpd}}{1 + \frac{1}{6} \sum_{c_n \in N} \frac{pd(c_n, t - delay_{mm_b})}{critpd} + \left[ \frac{pm_a m_a(c_k, t - delay_{mm_b} - \delta_M)}{critpm_a m_a} \right]^2} + \left[ \frac{pm_b m_b(c_k, t - delay_{mm_b} - \delta_M)}{critpm_b m_b} \right]^2 \right] - mdm_b \cdot m_b(c_k, t)$$

where  $N$  represents all the neighbors of the  $k^{th}$  cell ( $c_k$ )



## B. Monomer Protein Levels

### B.1. Her Monomer Protein Levels

$$\frac{\partial ph(c_k, t)}{\partial t} = psh \cdot mh(c_k, t - \text{delayph}) - pdh \cdot ph(c_k, t) + 2ddhh \cdot phh(c_k, t) - 2dahh \cdot ph(c_k, t) \cdot ph(c_k, t)$$

### B.2. Delta Monomer Protein Levels

$$\frac{\partial pd(c_k, t)}{\partial t} = psd \cdot md(c_k, t - \text{delaypd}) - pdd \cdot pd(c_k, t)$$

### B.3. Mespa Monomer Protein Levels

$$\begin{aligned} \frac{\partial pm_a(c_k, t)}{\partial t} = & psm_a \cdot mm_a(c_k, t - \text{delaypm}_a) - pdm_a \cdot pm_a(c_k, t) + 2ddm_a m_a \cdot pm_a m_a(c_k, t) - 2dam_a m_a \cdot pm_a(c_k, t) \cdot pm_a(c_k, t) \\ & + ddm_a m_b \cdot pm_a m_b(c_k, t) - dam_a m_b \cdot pm_a(c_k, t) \cdot pm_b(c_k, t) \end{aligned}$$

### B.4. MespB Monomer Protein Levels

$$\begin{aligned} \frac{\partial pm_b(c_k, t)}{\partial t} = & psm_b \cdot mm_b(c_k, t - \text{delaypm}_b) - pdm_b \cdot pm_b(c_k, t) + 2ddm_b m_b \cdot pm_b m_b(c_k, t) - 2dam_b m_b \cdot pm_b(c_k, t) \cdot pm_b(c_k, t) \\ & + ddm_a m_b \cdot pm_a m_b(c_k, t) - dam_a m_b \cdot pm_a(c_k, t) \cdot pm_b(c_k, t) \end{aligned}$$

## C. Dimer Protein Levels

### C.1. Her-Her Dimer Protein Levels

$$\frac{\partial phh(c_k, t)}{\partial t} = -ddhh \cdot phh(c_k, t) + dahh \cdot ph(c_k, t) \cdot ph(c_k, t) - pdhh \cdot phh$$

### C.2. Mespa-Mespa Dimer Protein Levels

$$\frac{\partial pm_a m_a(c_k, t)}{\partial t} = -ddm_a m_a \cdot pm_a m_a(c_k, t) + dam_a m_a \cdot pm_a(c_k, t) \cdot pm_a(c_k, t) - pdm_a m_a \cdot pm_a m_a$$

### C.3. MespB-MespB Dimer Protein Levels

$$\frac{\partial pm_b m_b(c_k, t)}{\partial t} = -ddm_b m_b \cdot pm_b m_b(c_k, t) + dam_b m_b \cdot pm_b(c_k, t) \cdot pm_b(c_k, t) - pdm_b m_b \cdot pm_b m_b$$

### C.4. Mespa-MespB Dimer Protein Levels

$$\frac{\partial pm_a m_b(c_k, t)}{\partial t} = -ddm_a m_b \cdot pm_a m_b(c_k, t) + dam_a m_b \cdot pm_a(c_k, t) \cdot pm_b(c_k, t) - pdm_a m_b \cdot pm_a m_b$$

## Spatial modeling

A two-dimensional hexagonal grid of  $4 \times 50$  cells was used to represent the PSM tissue in our simulations. The right- and left-most cells in each column were connected artificially, such that each cell has six neighbors, excluding the cells located in the most posterior and anterior columns that have only four neighbors. The model was simulated for 930 min in total. In the first 300 min, we simulated only  $4 \times 10$  cells forming the posterior PSM. Then, we grew the posterior PSM tissue for 240 min until the PSM was full by adding a column of 4 cells every six minutes. After the PSM was full, we added a column of 4 cells at the posterior end, and removed an older column of cells at the anterior end to keep a fixed PSM size. We set the Her and DeltaC translational time delays within a biologically relevant range in the posterior PSM (first 10 columns of cells); this rate was linearly interpolated at all intermediate (middle 20 columns of cells) and anterior PSM locations (last 20 columns of cells). The largest translational time delays at the anterior PSM for Her and DeltaC proteins were set to 3.9 fold of posterior PSM (Ay et al., 2014). Similarly, the translational time delays of Mespa and MespB proteins were increased 2.1 fold from mid-PSM to anterior PSM. The model implicitly implements the input of FGF signaling on *mesp* transcription, by restricting the transcription zone of *mesp* genes only to anterior PSM in simulations.

## Pseudo-stochastic numerical simulation

We carried out pseudo-stochastic simulations of our delay differential equation model to reproduce randomness in the regulatory network. Biochemical reaction rates (parameters in the model) were allowed to change up to 16% between cells to generate the inherent stochasticity in this biological system. The variations in reaction rates were formed during the creation of the cells and kept constant throughout the lifetime of the cells in the PSM. The perturbed system of DDEs was solved numerically using Euler's method. Euler's method increments the time by the

chosen step size (0.01 min), and updates mRNA and mono and dimer protein levels after each iteration using the rates of change specified by the DDEs. To simulate a *notch1a*<sup>-/-</sup> mutant, we set the translation rate of the DeltaC protein (*psd*) to zero. To simulate the DAPT condition, we set *psd* to 0 after 600 min. Overexpression of *her* gene was modeled by increasing its translation rate *psd* from 600 to 630 min. Similarly, we modeled overexpression of *mespa* and *mespb* genes by increasing their translation rates *psm<sub>a</sub>* and *psm<sub>b</sub>* from 600 to 660 min.

### Parameter estimation

Delays in transcription and translation and degradation rates of mRNA and protein have been measured experimentally (Ay et al., 2014; Ay et al., 2013; Giudicelli et al., 2007; Hanisch et al., 2013). However, some of the reaction rates have not been measured due to technical limitations. We used parameter estimation to identify biologically relevant reaction rates (model parameters) that could reproduce the experimental observations.

Parameter search was performed using the stochastic ranking evolutionary strategy (SRES) algorithm (Runarsson and Yao, 2000), which looked for suitable parameter sets fit to experimental conditions (Table S2). The SRES algorithm performs better than other parameter estimation algorithms in large-scale non-linear biological systems (Fakhouri et al., 2010; Fomekong-Nanfack et al., 2007; Moles et al., 2003). We used the ranges provided in Ay *et al.* (2014) for the parameters that represent the same functionality as the model from (Ay et al., 2014). New parameters were given freedom within biologically realistic limits. To produce biologically feasible parameter ranges (Table S1), parameter ranges were refined a few times based on the results of initial parameter searches.

### Posterior PSM

The DDE model was simulated for 300 min in 40 (4 rows of 10 cells) posterior PSM cells to obtain *her* mRNA expression levels. The period was calculated as the time difference between the last two peaks of *her* mRNA oscillations.

### Whole PSM

The PSM reached its full size of 200 cells in 540 min in our simulations. To calculate the amplitude and synchrony of segmentation network genes, we took 1 snapshot for overexpression experiments, and 5 snapshots for *notch1a*<sup>-/-</sup> mutant and DAPT treatment over 30 min of simulation.

The amplitudes for overexpression embryos were calculated as the change between the average of top ten and bottom ten corresponding gene expression levels. The amplitudes for *notch1a*<sup>-/-</sup> mutant and DAPT embryos were calculated as the mean of the five measured amplitudes found using five snapshots. The synchronization scores for overexpression transgenics were measured by finding average of the three Pearson correlation coefficients measured between each row of cells and the first row of cells. The synchronization scores for *wildtype*, *notch1a*<sup>-/-</sup>, and DAPT embryos were calculated as the mean of the five calculated synchronization scores found using five snapshots. The complementarity between *her* and *mespa/mespb* genes were calculated as the average of the fifteen (five snapshots, four rows) Pearson correlation coefficients between *her* and *mespa/mespb* gene expression levels.

### Coding

The model and related analysis are implemented in C++ and Python. C++ is used for the model's numerical simulation and parameter search, because of its speed. Python is used due to its user-friendly and superior data processing and plotting libraries. Our code can perform a 930

min simulation of 200 PSM cells in less than 1 min on an iMAC running MAC OSX 10.12.4 with 3.1 GHz Intel Core i7 and 16 GB of RAM. A parallel version of our code is written using the Message Passing Interface (MPI) for time-intensive parameter searches. Each SRES parameter estimation run with a population size of 20, 3 parents, and 2,000 generations took approximately 48 hours using 24 processors on a computer cluster of 19 nodes, 248 processors, and 24 gigabytes of RAM per node.

## DATA AND SOFTWARE AVAILABILITY

The C++ and Python codes will be made available upon request.

## REFERENCES

- Ay, A., Holland, J., Sperlea, A., Devakanmalai, G.S., Knierer, S., Sangervasi, S., Stevenson, A., and Ozbudak, E.M. (2014). Spatial gradients of protein-level time delays set the pace of the traveling segmentation clock waves. *Development* *141*, 4158-4167.
- Ay, A., Knierer, S., Sperlea, A., Holland, J., and Özbudak, E.M. (2013). Short-lived Her Proteins Drive Robust Synchronized Oscillations in the Zebrafish Segmentation Clock. *Development* *140*, 3244-3253.
- Fakhouri, W.D., Ay, A., Sayal, R., Dresch, J., Dayringer, E., and Arnosti, D.N. (2010). Deciphering a transcriptional regulatory code: modeling short-range repression in the *Drosophila* embryo. *Molecular Systems Biology* *6*.
- Fomekong-Nanfack, Y., Kaandorp, J.A., and Blom, J. (2007). Efficient parameter estimation for spatio-temporal models of pattern formation: case study of *Drosophila melanogaster*. *Bioinformatics* *23*, 3356-3363.
- Giudicelli, F., Ozbudak, E.M., Wright, G.J., and Lewis, J. (2007). Setting the Tempo in *Development*: An Investigation of the Zebrafish Somite Clock Mechanism. *PLoS Biol* *5*, e150.
- Hanisch, A., Holder, M.V., Choorapoikayil, S., Gajewski, M., Ozbudak, E.M., and Lewis, J. (2013). The elongation rate of RNA Polymerase II in the zebrafish and its significance in the somite segmentation clock. *Development* *140*, 444-453.
- Henry, C.A., Urban, M.K., Dill, K.K., Merlie, J.P., Page, M.F., Kimmel, C.B., and Amacher, S.L. (2002). Two linked hairy/Enhancer of split-related zebrafish genes, *her1* and *her7*, function together to refine alternating somite boundaries. *Development* *129*, 3693-3704.
- Jiang, Y.J., Aerne, B.L., Smithers, L., Haddon, C., Ish-Horowicz, D., and Lewis, J. (2000). Notch signalling and the synchronization of the somite segmentation clock. *Nature* *408*, 475-479.
- Lee, Y., Grill, S., Sanchez, A., Murphy-Ryan, M., and Poss, K.D. (2005). Fgf signaling instructs position-dependent growth rate during zebrafish fin regeneration. *Development* *132*, 5173-5183.
- Lewis, J. (2003). Autoinhibition with transcriptional delay: A simple mechanism for the zebrafish somitogenesis oscillator. *Current Biology* *13*, 1398-1408.
- Lewis, J.L., Bonner, J., Modrell, M., Ragland, J.W., Moon, R.T., Dorsky, R.I., and Raible, D.W. (2004). Reiterated Wnt signaling during zebrafish neural crest development. *Development* *131*, 1299-1308.
- Moles, C.G., Mendes, P., and Banga, J.R. (2003). Parameter estimation in biochemical pathways: A comparison of global optimization methods. *Genome Research* *13*, 2467-2474.
- Oates, A.C., and Ho, R.K. (2002). Hairy/E(spl)-related (Her) genes are central components of the segmentation oscillator and display redundancy with the Delta/Notch signaling pathway in the formation of anterior segmental boundaries in the zebrafish. *Development* *129*, 2929-2946.

Ozbudak, E.M., and Lewis, J. (2008). Notch signalling synchronizes the zebrafish segmentation clock but is not needed to create somite boundaries. *PLoS genetics* 4, e15.

Riedel-Kruse, I.H., Muller, C., and Oates, A.C. (2007). Synchrony dynamics during initiation, failure, and rescue of the segmentation clock. *Science* 317, 1911-1915.

Runarsson, T.P., and Yao, X. (2000). Stochastic ranking for constrained evolutionary optimization. *Ieee T Evolut Comput* 4, 284-294.

Takke, C., and Campos-Ortega, J.A. (1999). *her1*, a zebrafish pair-rule like gene, acts downstream of notch signalling to control somite development. *Development* 126, 3005-3014.

Watanabe, T., Saito, D., Tanabe, K., Suetsugu, R., Nakaya, Y., Nakagawa, S., and Takahashi, Y. (2007). Tet-on inducible system combined with in ovo electroporation dissects multiple roles of genes in somitogenesis of chicken embryos. *Dev Biol* 305, 625-636.

Wehner, D., Jahn, C., and Weidinger, G. (2015). Use of the TetON System to Study Molecular Mechanisms of Zebrafish Regeneration. *Jove-J Vis Exp*.

Windner, S.E., Doris, R.A., Ferguson, C.M., Nelson, A.C., Valentin, G., Tan, H., Oates, A.C., Wardle, F.C., and Devoto, S.H. (2015). *Tbx6*, *Mesp-b* and *Ripply1* regulate the onset of skeletal myogenesis in zebrafish. *Development* 142, 1159-1168.
